# Supplementary material for: Citric acid and plasma treated MoS 2 for high-performance supercapacitors
Source: Royal Society of Chemistry journal article supplement (doi:10.1039/d4tc04432k), 2024-11-14
Supplement: d4tc04432k1.pdf [file d4tc04432k1.pdf]

Supporting Information

## MoS<sub>2</sub> Modified with Citric Acid under Plasma Treatment for High-Performance Supercapacitor

Shaoqi Rui,<sup>a</sup> Zijian Li,<sup>a</sup> Lingshuai Meng,<sup>a</sup> Qi Wang,<sup>a</sup> Jing Xu,<sup>a</sup> Yujie Zhao,<sup>a</sup> Qingling Jia,<sup>a</sup> Han Li,<sup>\*ac</sup> Shun Lu,<sup>\*b</sup> Yongxing Zhang<sup>\*a</sup>

<sup>a</sup> Anhui Province Key Laboratory of Pollutant Sensitive Materials and Environmental Remediation, Anhui Province Key Laboratory of Intelligent Computing and Applications, Anhui Province Industrial Generic Technology Research Center for Aluminic Materials, Huaibei Normal University, Huaibei 235000, China

<sup>b</sup> Chongqing Institute of Green and Intelligent Technology, Chinese Academy of Sciences, Chongqing 400714, China

<sup>c</sup> Anhui Key Laboratory of Nanomaterials and Nanotechnology, Hefei 230031, China

\*E-mail: lh2017@mail.ustc.edu.cn (H. Li); lushun@cigit.ac.cn (L. Lu);

zyx07157@mail.ustc.edu.cn (Y. Zhang)

## List of Texts and Figures

**Text S1.** Experimental section.

**Text S2.** Material characterizations.

**Fig. S1.** The high-resolution XPS of N 1s for MoS<sub>2</sub>/C, MoS<sub>2</sub>/C-100W, MoS<sub>2</sub>/C-200W, and MoS<sub>2</sub>/C-300W.

**Fig. S2.** SEM images of MoS<sub>2</sub>/C, MoS<sub>2</sub>/C-100 W, MoS<sub>2</sub>/C-200 W, and MoS<sub>2</sub>/C-300 W.

**Fig. S3.** EPR spectra of MoS<sub>2</sub>/C and MoS<sub>2</sub>/C-200W at room temperature.

**Fig. S4.** The XRD patterns and SEM images of MoS<sub>2</sub>/C-200 W before and after cycling.

**Fig. S5.** The CV and GCD curves of MoS<sub>2</sub>/C, MoS<sub>2</sub>/C-100 W, MoS<sub>2</sub>/C-200 W, and MoS<sub>2</sub>/C-300 W at a series of scan rates and current densities.

**Fig. S6.** CV partition analysis showing the capacitive contribution to the total current for MoS<sub>2</sub>/C-200 W electrode at 10, 20, 50 and 70 mV s<sup>-1</sup>.

**Table S1.** The specific capacitance, power density and energy density of SSC device.

**Text S1.** Experimental section.

*1.1 Chemicals:* Ammonium molybdate tetrahydrate ((NH<sub>4</sub>)<sub>6</sub>Mo<sub>7</sub>O<sub>24</sub>·4H<sub>2</sub>O, 99%), thioacetamide (C<sub>2</sub>H<sub>5</sub>NS, 99%), ethanol (CH<sub>3</sub>CH<sub>2</sub>OH, 95%), polyethylenepolypropylene glycol (H(OCH<sub>2</sub>CH<sub>2</sub>)<sub>x</sub>(OCH<sub>2</sub>CHCH<sub>3</sub>)<sub>y</sub>(OCH<sub>2</sub>CH<sub>2</sub>)<sub>z</sub>OH, F68), anhydrous sodium sulfate were (Na<sub>2</sub>SO<sub>4</sub>, 99%) and potassium chloride (KCl, 99.8%) were purchased from Sinopharm Chemical Reagent Co. Ltd. (Shanghai, China). All chemicals were used without any further purification.

*1.2 Preparation of MoS<sub>2</sub>/C-100 W, MoS<sub>2</sub>/C-200 W, and MoS<sub>2</sub>/C-300 W electrode*

In the experiment, 0.7242 g of ammonium molybdate ((NH<sub>4</sub>)<sub>6</sub>Mo<sub>7</sub>O<sub>24</sub>·4H<sub>2</sub>O), 1.4209 g of thioacetamide (CH<sub>4</sub>N<sub>2</sub>S) and 0.1 g citric acid (C<sub>6</sub>H<sub>8</sub>O<sub>7</sub>, CA) were dissolved in a mixed solution containing 22 mL of deionized water. The mixed solution was stirred vigorously with a magnetic stirrer until it became transparent. It was then transferred to a Teflon-lined stainless steel autoclave and heated to 210 °C for 18 hours. After the reaction cooled to room temperature, the samples underwent thorough washing with deionized water and ethanol, conducted three to four times to achieve high purity. Deionized water effectively removes polar impurities, while ethanol aids in dissolving organic contaminants. Subsequently, the cleaned samples were dried in a vacuum oven at 60°C to prevent degradation or moisture retention.

The process of creating a composite electrode involves mixing activated carbon super-p and polyvinylidene fluoride (PVDF) in N-methylpyrrolidone (NMP) to obtain a homogeneous slurry. The combination leverages the high surface area of super-p for

enhanced electrochemical performance while utilizing PVDF as a binder to ensure structural integrity. The resulting slurry is then coated onto nickel foam (NF), which serves as a current collector due to its high conductivity and lightweight properties.

The Ni foam covered with MoS<sub>2</sub>/C was treated by plasma activation with air, 60 Pa of pressure, and 5 min of activation time. The working electrodes made of MoS<sub>2</sub>/C are subjected to varying power levels-100 W, 200 W, and 300 W. These treatments, referred to as MoS<sub>2</sub>/C-100 W, MoS<sub>2</sub>/C-200 W, and MoS<sub>2</sub>/C-300 W, aim to optimize the electrochemical properties of the electrodes.

### *1.3 Electrochemical measurement and evaluations*

Electrochemical performance is measured using a three-electrode configuration. The three-electrode configuration consists of a 1×1 cm<sup>2</sup> platinum plate as the counter electrode, Ag/AgCl in 1 M KCl as the reference electrode, and the tested electrode as the working electrode. The electrochemical data is obtained using the Dutch Ivium (Vertex. C. DC) electrochemical station in 1 M Na<sub>2</sub>SO<sub>4</sub>, allowing for the collection of cyclic voltammetry (CV), galvanostatic charge-discharge (GCD), and electrochemical impedance spectroscopy (EIS).

### *1.4 Preparation of symmetric supercapacitor (SSC) device*

Initially, 1 g of polyvinyl alcohol (PVA) powder was dissolved in 10 mL of deionized (DI) water, and the mixture was heated to 90°C with meticulous stirring until the solution turned clear. Subsequently, 3-5 mL of aqueous Na<sub>2</sub>SO<sub>4</sub> (1 M) was added by drop into the above solution while continuously stirring. MoS<sub>2</sub>/C-200 W on carbon cloths were assembled. After the PVA-Na<sub>2</sub>SO<sub>4</sub> gel solidified at room temperature, the

symmetric supercapacitor (SSC) device was achieved.

## Text S2. Material characterizations

XRD spectra were collected on X-ray diffraction (PANalytical Empyrean) with Cu  $K\alpha$  radiation ( $\lambda = 0.154$  nm). Materials nanostructure characterizations come from Field emission scanning electron microscope (FE-SEM, HiTACHI Regulus8220) and Energy-dispersive X-ray spectroscopy (EDX, Oxford EDX, with INCA software), and transmission electron microscope (TEM, JEM-2100) with configured EDX. Valence structure was collected by X-ray photoelectron spectroscopy (XPS, Thermo ESCALAB 250Xi equipped with monochromatic Al  $K\alpha$  source).

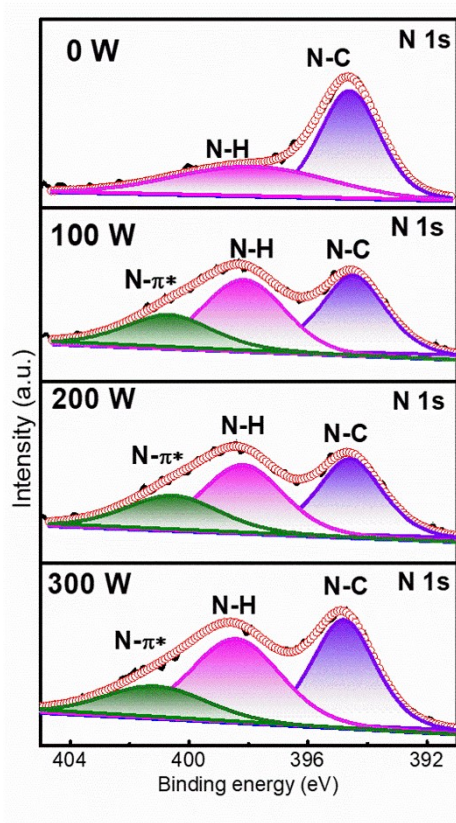

**Fig. S1.** The high-resolution XPS of N 1s for MoS<sub>2</sub>/C, MoS<sub>2</sub>/C-100W, MoS<sub>2</sub>/C-200W, and MoS<sub>2</sub>/C-300W.

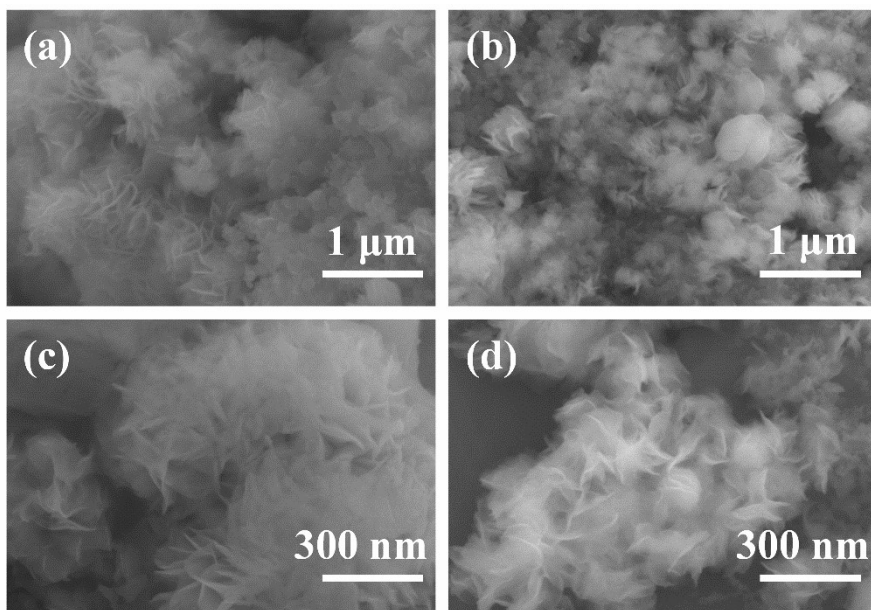

**Fig. S2.** SEM images of MoS<sub>2</sub>/C, MoS<sub>2</sub>/C-100 W, MoS<sub>2</sub>/C-200 W, and MoS<sub>2</sub>/C-300 W.

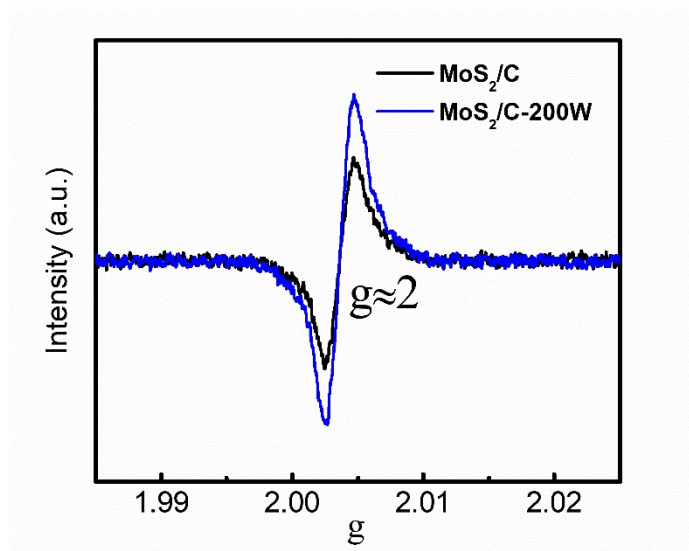

**Fig. S3.** EPR spectra of MoS<sub>2</sub>/C and MoS<sub>2</sub>/C-200W at room temperature.

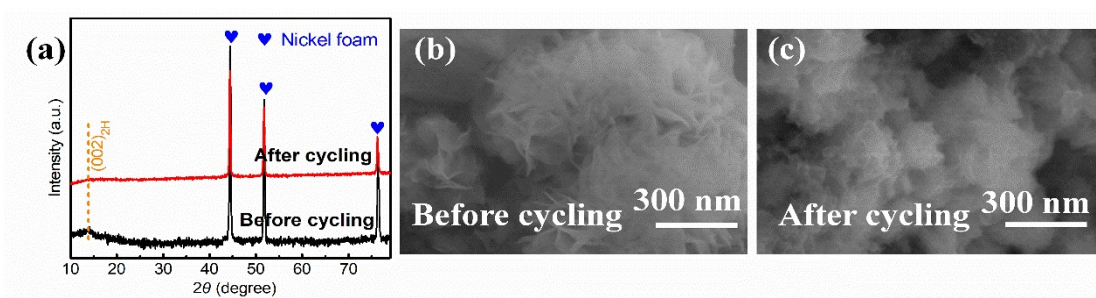

**Fig. S4.** The XRD patterns and SEM images of MoS<sub>2</sub>/C-200 W before and after cycling.

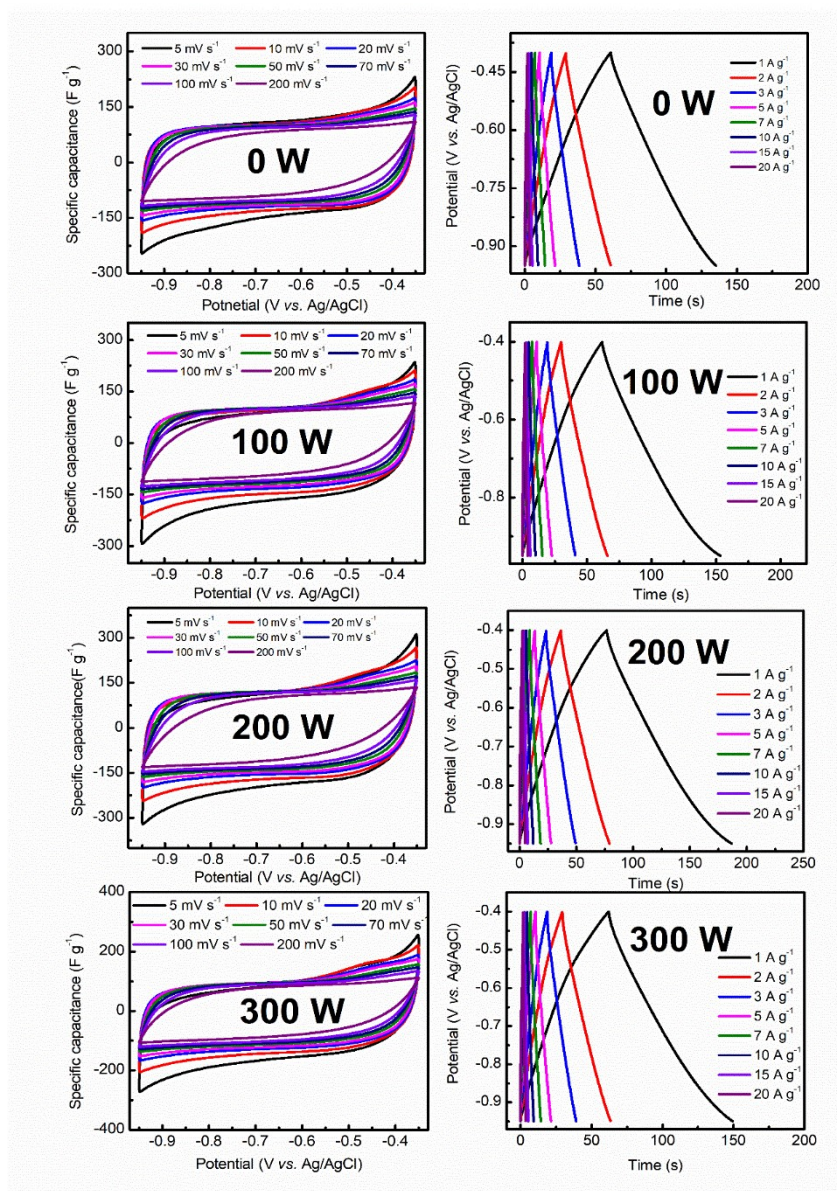

**Fig. S5.** The CV and GCD curves of MoS<sub>2</sub>/C, MoS<sub>2</sub>/C-100 W, MoS<sub>2</sub>/C-200 W, and MoS<sub>2</sub>/C-300 W at a series of scan rates and current densities.

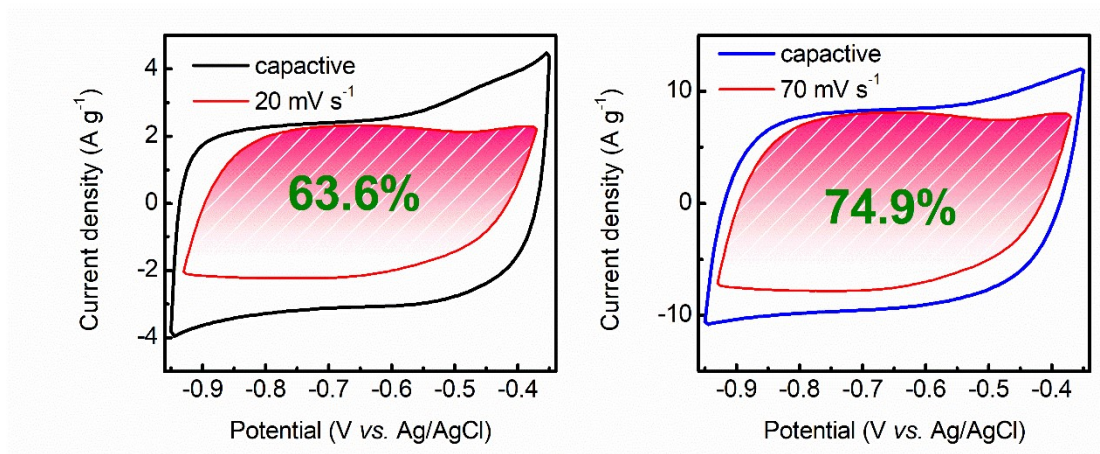

**Fig. S6.** CV partition analysis showing the capacitive contribution to the total current for MoS<sub>2</sub>/C-200 W electrode at 20 and 70 mV s<sup>-1</sup>.

**Table S1.** The specific capacitance, power density and energy density of SSC device.

| Current density<br>(mA cm <sup>-2</sup> )      | 1      | 2      | 3      | 5       | 7       | 10      | 15      | 20     |
|------------------------------------------------|--------|--------|--------|---------|---------|---------|---------|--------|
| Specific capacitance<br>(mF cm <sup>-2</sup> ) | 202    | 172    | 159    | 140     | 129     | 118     | 101     | 87     |
| Power density<br>(μWh cm <sup>-2</sup> )       | 275.85 | 549.11 | 829.24 | 1374.55 | 1931.88 | 2747.08 | 4125.41 | 5728.7 |
| Energy density<br>(μW cm <sup>-2</sup> )       | 8.49   | 7.23   | 6.68   | 5.88    | 5.42    | 4.96    | 4.24    | 3.66   |
